# Supplementary material for: International prevalence patterns of low eGFR in adults aged 18-60 without traditional risk factors from population-based cross-sectional studies: a disadvantaged populations eGFR epidemiology (DEGREE) study
Source: bioRxiv or medRxiv preprint supplement (doi:10.1101/2024.06.24.24309380), 2024-11-01
Supplement: Supplementary file [file media-1.pdf]

Supplementary material

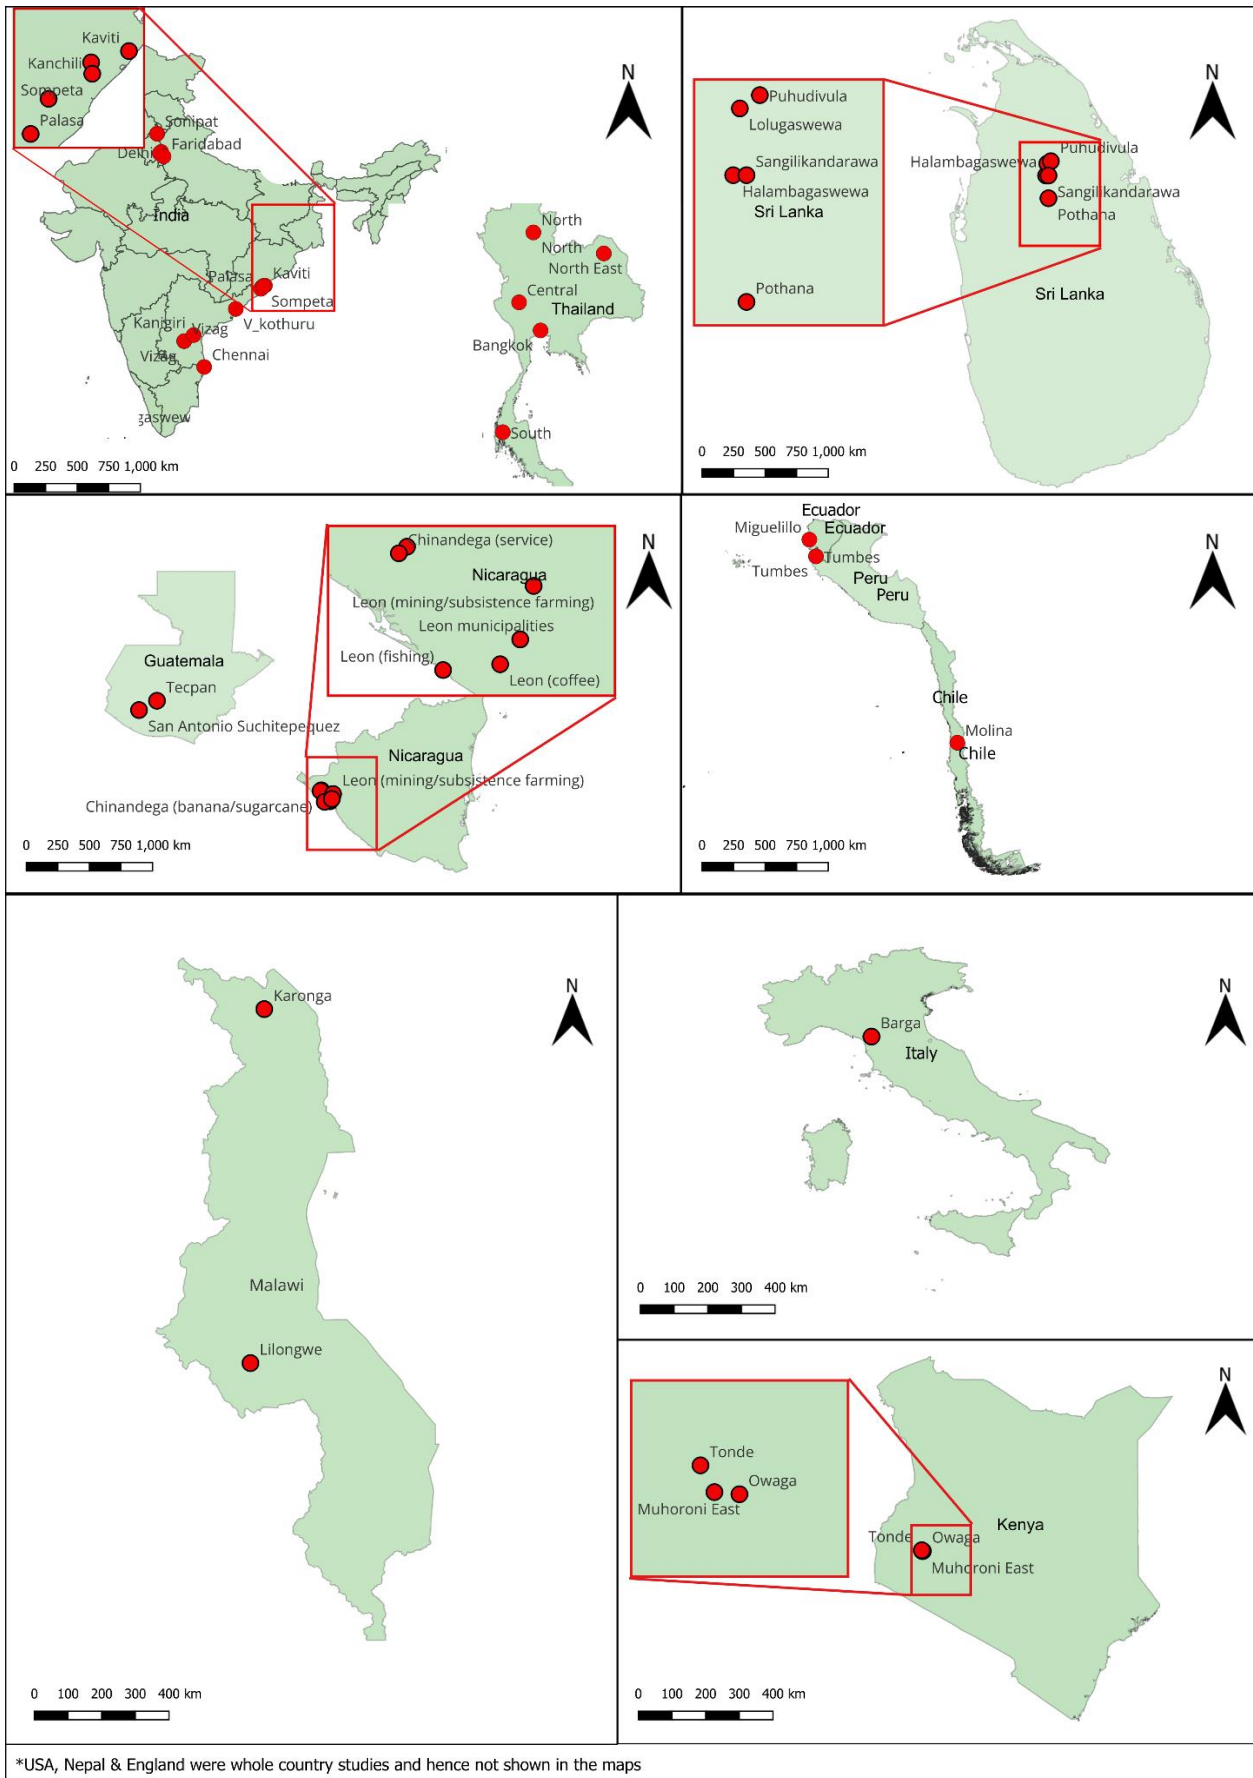

Figure S1: DEGREE centre locations within countries\*

Table S1: Definitions of variables and any differences between studies

| Centre              | Hypertension definition                                                                                                          | Diabetes definition                                                              | Heavy proteinuria definition      | eGFR calculation                                                                            | Other                                                                                                                                                      |
|---------------------|----------------------------------------------------------------------------------------------------------------------------------|----------------------------------------------------------------------------------|-----------------------------------|---------------------------------------------------------------------------------------------|------------------------------------------------------------------------------------------------------------------------------------------------------------|
| Chile               | Self-report of diagnosis or mean (of 2) SBP $\geq$ 140mmHg or DBP $\geq$ 90mmHg or use of antihypertensive drugs in past 2 weeks | Self-report or glycemia $\geq$ 126mg/dL or use of hypoglycemic drugs             | urine ACR $\geq$ 300mg/g          | CKD-EPI 2021                                                                                | Tables provided                                                                                                                                            |
| Ecuador             | SBP $\geq$ 140 or DBP $\geq$ 90 mmHg in two different measurements                                                               | HbA1c $\geq$ 6.5%.                                                               | urine dipstick protein $\geq$ +++ | CKD-EPI 2009 (with race) for eGFR <sub>creat</sub>                                          | Tables provided.                                                                                                                                           |
| England             | Self report of diagnosis, or mean (of 3) SBP $\geq$ 140 mmHg or DBP $\geq$ 90mmHg                                                | Self report of diagnosis or HbA1c $\geq$ 6.5%                                    | urine ACR $>$ 300mg/g             | CKD-EPI 2009 (with race) for eGFR <sub>creat</sub> and CKD-EPI 2012 for eGFR <sub>cys</sub> | Nationally representative nationwide survey. Age groups are one year out i.e. 18-29, 30-39, 40-49, 50-59.                                                  |
| Guatemala           | Self report of diagnosis, or mean (of 3) SBP $\geq$ 140mmHg or DBP $\geq$ 90mmHg                                                 | Self report of diagnosis or HbA1c $\geq$ 6.5%                                    | urine ACR $>$ 300mg/g             | CKD-EPI 2009 (non race) for eGFR <sub>creat</sub>                                           |                                                                                                                                                            |
| India 1 (CARRS)     | Self-report of diagnosis or mean SBP $\geq$ 140mmHg or DBP $\geq$ 90 mmHg                                                        | Self report of diagnosis or HbA1c $\geq$ 6.5% or fasting glucose $\geq$ 126mg/dl | urine ACR $>$ 300mg/g             | CKD-EPI 2009 (non race) for eGFR <sub>creat</sub>                                           | Age $<$ 20 years excluded. Pregnant, bedridden and participants who were unable to comprehend the questionnaires due cognitive deficiencies were excluded. |
| India 2 (ICMR)      | Self-report of diagnosis or mean SBP $\geq$ 140mmHg or DBP $\geq$ 90mmHg                                                         | Self report of diagnosis or HbA1c $\geq$ 6.5% or fasting glucose $\geq$ 126mg/dl | urine ACR $>$ 300mg/g             | CKD-EPI 2009 (non race) for eGFR <sub>creat</sub>                                           | Age $<$ 30 years excluded. Pregnant, bedridden and participants who were unable to comprehend the questionnaires due cognitive deficiencies were excluded. |
| India 3 (UDAY)      | Self-report of diagnosis or mean SBP $\geq$ 140mmHg or DBP $\geq$ 90mmHg                                                         | Self report of diagnosis or HbA1c $\geq$ 6.5% or fasting glucose $\geq$ 126mg/dl | urine ACR $>$ 300mg/g             | CKD-EPI 2009 (non race) for eGFR <sub>creat</sub> and CKD-EPI 2012 for eGFR <sub>cys</sub>  | Age $<$ 30 years excluded. Pregnant, bedridden and participants who were unable to comprehend the questionnaires due cognitive deficiencies were excluded. |
| India 4 (Uddanam)   | Self-report of $>$ 5 year hypertension                                                                                           | HbA1c $\geq$ 6.5%                                                                | urine PCR $>$ 150mg/g             | CKD-EPI 2012 (non race) for eGFR <sub>creat</sub>                                           | Tables provided.                                                                                                                                           |
| India 5 (Prakasham) | SBP $\geq$ 140mmHg or DBP $\geq$ 90mmHg                                                                                          | HbA1c $\geq$ 6.5%                                                                | urine ACR $\geq$ 300mg/g          | CKD-EPI 2021 (non-race) for eGFR <sub>creat</sub>                                           | Tables provided.                                                                                                                                           |
| Italy               | Self-report of diagnosis or SBP $\geq$ 140mmHg or DBP $\geq$ 90mmHg                                                              | Self-report of diagnosis                                                         | urine dipstick protein $\geq$ ++  | CKD-EPI 2009 (non race) for eGFR <sub>creat</sub>                                           |                                                                                                                                                            |
| Kenya               | Self-report of diagnosis or medication for hypertension, mean SBP $\geq$ 140mmHg or mean DBP $\geq$ 90mmHg                       | Self-report of diagnosis or diabetic medication                                  | urine dipstick protein $\geq$ ++  | CKD-EPI 2009 (non race) for eGFR <sub>creat</sub> and CKD-EPI 2012 for eGFR <sub>cys</sub>  |                                                                                                                                                            |

|             |                                                                                                                       |                                                                                                                      |                                   |                                                                                            |                                                                                                                                   |
|-------------|-----------------------------------------------------------------------------------------------------------------------|----------------------------------------------------------------------------------------------------------------------|-----------------------------------|--------------------------------------------------------------------------------------------|-----------------------------------------------------------------------------------------------------------------------------------|
| Malawi      | Self-report of diagnosis, or hypertensive medication in last 2 weeks, or mean SBP $\geq$ 140mmHg or DBP $\geq$ 90mmHg | Glucose $\geq$ 7mmol/L, or self-report previous diagnosis or diabetic medication                                     | urine ACR $>$ 300mg/g             | CKD-EPI 2009 (non race) for eGFR <sub>creat</sub> and CKD-EPI 2012 for eGFR <sub>cys</sub> |                                                                                                                                   |
| Nepal       | Diagnosis (verified through medical records provided by participant) or mean SBP $\geq$ 140mmHg or DBP $\geq$ 90mmHg  | Taking diabetic medication, or fasting glucose $\geq$ 126mg/dL or post prandial blood glucose levels $\geq$ 200mg/dL | Urine protein $\geq$ 300 mg/dL    | CKD-MDRD for eGFR <sub>creat</sub>                                                         | Nationally representative nationwide survey. Too frail participants and those who cannot provide written consent were excluded.   |
| Nicaragua 1 | Self-report of diagnosis, or SBP $\geq$ 140mmHg or DBP $\geq$ 90mmHg                                                  | Self-reported diagnosis or glucosuria $\geq$ 100mg/dL using a urine stick                                            | urine dipstick protein $\geq$ +++ | CKD-MDRD for eGFR <sub>creat</sub>                                                         | Tables provided.                                                                                                                  |
| Nicaragua 2 | Self-report of diagnosis or mean SBP $\geq$ 140mmHg or DBP $\geq$ 90mmHg                                              | Self-reported diagnosis or serum glucose $\geq$ 110mg/dL                                                             | urine dipstick protein $\geq$ +++ | CKD-EPI 2012 (with race) for eGFR <sub>creat</sub>                                         | Tables provided. Stratified by urban/rural to match the population rate                                                           |
| Peru        | Self-report of diagnosis, or mean SBP $\geq$ 140mmHg or DBP $\geq$ 90mmHg                                             | Self reported diagnosis, or taking diabetes medication, or fasting glucose $\geq$ 126mg/dL                           | urine dipstick protein $\geq$ ++  | CKD-EPI 2009 for eGFR <sub>creat</sub> and CKD-EPI 2012 for eGFR <sub>cys</sub>            | Stratified by urban/rural to 50% and sex. Female recruitment stopped after reaching 60% for each subgroup.                        |
| Sri Lanka   | Self report of taking medication for hypertension, or mean SBP $\geq$ 140mmHg or DBP $\geq$ 90mmHg                    | Self-reported diagnosis, or current diabetic medication, or fasting glucose $\geq$ 126mg/dL                          | urine ACR $>$ 300 mg/g            | CKD-EPI 2009 for eGFR <sub>creat</sub>                                                     | Stratified by urban/rural (almost 50% in each group) and by sex. Female recruitment stopped after reaching 60% for each subgroup. |
| Thailand    | Self report of taking medication for hypertension, or mean SBP $\geq$ 140mmHg or DBP $\geq$ 90mmHg                    | Use of antihypoglycemic medications, or fasting plasma glucose $\geq$ 126mg/dL                                       | urine dipstick protein $\geq$ ++  | CKD-EPI 2009 (non race)                                                                    | Tables provided. Stratified, nationally representative, nationwide survey.                                                        |
| USA         | Self-report of diagnosis, or mean (of 3) SBP $\geq$ 140mmHg or DBP $\geq$ 90mmHg                                      | Self report of diagnosis or HbA1c $\geq$ 6.5%                                                                        | urine ACR $>$ 300mg/g             | CKD-EPI 2009 (non race) for eGFR <sub>creat</sub>                                          | Nationally representative nationwide survey. Urban/rural flag unavailable.                                                        |

SBP=systolic blood pressure; DBP=diastolic blood pressure; ACR=albumin creatinine ratio; HbA1c=glycated haemoglobin; CKD-EPI=The Chronic Kidney Disease Epidemiology Collaboration; CKD-MDRD=Chronic Kidney Disease Modification of Diet in Renal Disease

Table S2: Age-standardised prevalence of eGFR<60 ml/min/1.73m<sup>2</sup> in total sample and complete data sample, by sex

| Centre              | Area                      | Rural / Urban | Total Sample men | Men with missing data | Total sample prevalence of eGFR<60 <sup>a</sup> in men % (95% CI) | Complete case prevalence of eGFR<60 <sup>a</sup> in men % (95% CI) | Total Sample women | Women with missing data | Total sample prevalence of eGFR<60 <sup>a</sup> in women % (95% CI) | Complete case prevalence of eGFR<60 <sup>a</sup> in women % (95% CI) |
|---------------------|---------------------------|---------------|------------------|-----------------------|-------------------------------------------------------------------|--------------------------------------------------------------------|--------------------|-------------------------|---------------------------------------------------------------------|----------------------------------------------------------------------|
| Chile               | Molina                    | Rural         | 42               | 3                     | 0.0 (N/A)                                                         | 0.0 (N/A)                                                          | 18                 | 1                       | 0.0 (N/A)                                                           | 0.0 (N/A)                                                            |
| Chile               | Molina                    | Urban         | 167              | 11                    | 0.0 (N/A)                                                         | 0.0 (N/A)                                                          | 283                | 19                      | 1.5 (0.1, 2.9)                                                      | 1.6 (0.1, 3.1)                                                       |
| Ecuador             | Miguelillo                | Rural         | 312              | 0                     | 2.2 (0.7, 3.8)                                                    | 2.2 (0.7, 3.8)                                                     | 442                | 0                       | 6.4 (4.3, 8.5)                                                      | 6.4 (4.3, 8.5)                                                       |
| England             | all                       | Rural         | 167              | 6                     | 0.4 (0, 1.0)                                                      | 0.4 (0, 1.0)                                                       | 233                | 10                      | 2.1 (0.7, 3.5)                                                      | 2.2 (0.8, 3.7)                                                       |
| England             | all                       | Urban         | 789              | 45                    | 0.6 (0.1, 1.0)                                                    | 0.5 (0.1, 0.9)                                                     | 1063               | 56                      | 1.0 (0.6, 1.5)                                                      | 1.0 (0.6, 1.5)                                                       |
| Guatemala           | San Antonio Suchitepequez | Rural         | 119              | 4                     | 3.6 (0.4, 6.8)                                                    | 3.7 (0.4, 7.0)                                                     | 224                | 3                       | 1.3 (0, 2.8)                                                        | 1.3 (0, 2.8)                                                         |
| Guatemala           | Tecpan                    | Rural         | 116              | 7                     | 0.8 (0, 2.4)                                                      | 0.9 (0, 2.6)                                                       | 236                | 27                      | 0.0 (N/A)                                                           | 0.0 (N/A)                                                            |
| India 1 (CARRS)     | Chennai                   | Urban         | 2374             | 41                    | 0.9 (0.5, 1.2)                                                    | 0.9 (0.5, 1.3)                                                     | 3108               | 75                      | 0.6 (0.3, 0.9)                                                      | 0.6 (0.3, 0.9)                                                       |
| India 1 (CARRS)     | Delhi                     | Urban         | 1791             | 58                    | 1.0 (0.6, 1.5)                                                    | 1.0 (0.6, 1.5)                                                     | 1890               | 59                      | 1.2 (0.7, 1.6)                                                      | 1.2 (0.8, 1.6)                                                       |
| India 2 (ICMR)      | Delhi                     | Urban         | 864              | 27                    | 1.2 (0.6, 1.8)                                                    | 1.2 (0.6, 1.9)                                                     | 1102               | 51                      | 2.3 (1.5, 3.1)                                                      | 2.3 (1.5, 3.1)                                                       |
| India 2 (ICMR)      | Faridabad                 | Rural         | 670              | 41                    | 1.6 (0.9, 2.4)                                                    | 1.6 (0.8, 2.4)                                                     | 845                | 61                      | 1.6 (0.9, 2.4)                                                      | 1.6 (0.9, 2.4)                                                       |
| India 3 (UDAY)      | Sonipat                   | Rural         | 778              | 10                    | 0.6 (0.2, 1.1)                                                    | 0.6 (0.2, 1.1)                                                     | 1184               | 48                      | 0.6 (0.2, 1.0)                                                      | 0.6 (0.2, 1.0)                                                       |
| India 3 (UDAY)      | Sonipat                   | Urban         | 1046             | 8                     | 0.9 (0.4, 1.3)                                                    | 0.9 (0.4, 1.3)                                                     | 1206               | 22                      | 0.6 (0.2, 0.9)                                                      | 0.6 (0.2, 0.9)                                                       |
| India 3 (UDAY)      | Vizag                     | Rural         | 1019             | 85                    | 6.1 (3.0, 9.1)                                                    | 6.7 (2.9, 10.4)                                                    | 1349               | 107                     | 3.3 (2.2, 4.3)                                                      | 3.1 (2.2, 4.1)                                                       |
| India 3 (UDAY)      | Vizag                     | Urban         | 935              | 32                    | 1.2 (0.6, 1.8)                                                    | 1.2 (0.6, 1.8)                                                     | 1193               | 63                      | 0.7 (0.3, 1.1)                                                      | 0.7 (0.3, 1.1)                                                       |
| India 4 (Uddanam)   | Kanchili                  | Rural         | 148              | 0                     | 4.8 (1.1, 8.6)                                                    | 4.8 (1.1, 8.6)                                                     | 169                | 0                       | 7.2 (3.2, 11.3)                                                     | 7.2 (3.2, 11.3)                                                      |
| India 4 (Uddanam)   | Kaviti                    | Rural         | 102              | 0                     | 12.2 (7.7, 16.7)                                                  | 12.2 (7.7, 16.7)                                                   | 110                | 0                       | 8.0 (3.5, 12.4)                                                     | 8.0 (3.5, 12.4)                                                      |
| India 4 (Uddanam)   | Mandasa                   | Rural         | 95               | 0                     | 18.4 (10.7, 26.1)                                                 | 18.4 (10.7, 26.1)                                                  | 105                | 0                       | 10.6 (6.0, 15.1)                                                    | 10.6 (6.0, 15.1)                                                     |
| India 4 (Uddanam)   | Palasa                    | Rural         | 186              | 0                     | 11.2 (5.9, 16.5)                                                  | 11.2 (5.9, 16.5)                                                   | 176                | 0                       | 11.0 (6.1, 15.9)                                                    | 11.0 (6.1, 15.9)                                                     |
| India 4 (Uddanam)   | Sompeta                   | Rural         | 202              | 0                     | 9.2 (4.9, 13.4)                                                   | 9.2 (4.9, 13.4)                                                    | 241                | 0                       | 2.7 (0.9, 4.5)                                                      | 2.7 (0.9, 4.5)                                                       |
| India 4 (Uddanam)   | V_kothuru                 | Rural         | 250              | 0                     | 5.3 (3.0, 7.5)                                                    | 5.3 (3.0, 7.5)                                                     | 281                | 0                       | 4.9 (2.9, 7.0)                                                      | 4.9 (2.9, 7.0)                                                       |
| India 5 (Prakasham) | Kanigiri                  | Rural         | 420              | 0                     | 5.3 (3.4, 7.2)                                                    | 5.3 (3.4, 7.2)                                                     | 632                | 0                       | 3.4 (2.0, 4.7)                                                      | 3.4 (2.0, 4.7)                                                       |
| Italy               | Barga                     | Rural         | 130              | 2                     | 0.9 (0, 2.3)                                                      | 0.9 (0, 2.3)                                                       | 176                | 3                       | 0.7 (0, 1.7)                                                        | 0.7 (0, 1.7)                                                         |
| Kenya               | Muhoroni East             | Urban         | 138              | 0                     | 0.0 (N/A)                                                         | 0.0 (N/A)                                                          | 122                | 0                       | 0.9 (0, 2.7)                                                        | 0.9 (0, 2.7)                                                         |
| Kenya               | Owaga                     | Rural         | 138              | 25                    | 0.0 (N/A)                                                         | 0.0 (N/A)                                                          | 151                | 22                      | 2.1 (0, 4.5)                                                        | 2.2 (0, 4.8)                                                         |
| Kenya               | Tonde                     | Rural         | 114              | 0                     | 0.0 (N/A)                                                         | 0.0 (N/A)                                                          | 119                | 0                       | 0.0 (N/A)                                                           | 0.0 (N/A)                                                            |
| Malawi              | Karonga                   | Rural         | 286              | 15                    | 3.0 (0.6, 5.3)                                                    | 3.0 (0.7, 5.4)                                                     | 382                | 7                       | 3.0 (1.0, 4.9)                                                      | 3.0 (1.0, 5.1)                                                       |

|             |                                   |       |      |     |                   |                   |      |     |                |                |
|-------------|-----------------------------------|-------|------|-----|-------------------|-------------------|------|-----|----------------|----------------|
| Malawi      | Lilongwe                          | Urban | 96   | 0   | 2.2 (0, 6.2)      | 2.2 (0, 6.2)      | 216  | 0   | 4.9 (1.4, 8.4) | 4.9 (1.4, 8.4) |
| Nepal       | all                               | Rural | 1796 | 106 | 0.9 (0.5, 1.3)    | 0.9 (0.6, 1.3)    | 3151 | 361 | 2.1 (1.6, 2.6) | 2.1 (1.6, 2.6) |
| Nepal       | all                               | Urban | 1683 | 81  | 0.8 (0.4, 1.1)    | 0.8 (0.4, 1.1)    | 3160 | 326 | 3.0 (2.4, 3.5) | 3.0 (2.4, 3.6) |
| Nicaragua 1 | Chinandega (banana/sugarcane)     | Rural | 155  | 0   | 19.0 (12.5, 25.5) | 19.0 (12.5, 25.5) | 176  | 0   | 3.5 (0.6, 6.4) | 3.5 (0.6, 6.4) |
| Nicaragua 1 | Chinandega (service)              | Rural | 50   | 0   | 0.0 (N/A)         | 0.0 (N/A)         | 90   | 0   | 0.0 (N/A)      | 0.0 (N/A)      |
| Nicaragua 1 | Leon (coffee)                     | Rural | 40   | 0   | 6.3 (0, 14.4)     | 6.3 (0, 14.4)     | 37   | 0   | 0.0 (N/A)      | 0.0 (N/A)      |
| Nicaragua 1 | Leon (fishing)                    | Rural | 76   | 0   | 10.2 (3.2, 17.3)  | 10.2 (3.2, 17.3)  | 90   | 0   | 2.1 (0, 5.9)   | 2.1 (0, 5.9)   |
| Nicaragua 1 | Leon (mining/subsistence farming) | Rural | 158  | 0   | 16.2 (10.4, 22.0) | 16.2 (10.4, 22.0) | 224  | 0   | 4.8 (1.7, 7.9) | 4.8 (1.7, 7.9) |
| Nicaragua 2 | Leon municipalities               | Rural | 247  | 0   | 15.3 (10.9, 19.7) | 15.3 (10.9, 19.7) | 329  | 0   | 3.1 (1.2, 5.0) | 3.1 (1.2, 5.0) |
| Nicaragua 2 | Leon municipalities               | Urban | 400  | 0   | 10.0 (7.2, 12.7)  | 10.0 (7.2, 12.7)  | 696  | 0   | 3.6 (2.3, 4.8) | 3.6 (2.3, 4.8) |
| Peru        | Tumbes                            | Rural | 281  | 3   | 0.5 (0, 1.3)      | 0.5 (0, 1.3)      | 349  | 5   | 0.3 (0, 0.9)   | 0.3 (0, 0.9)   |
| Peru        | Tumbes                            | Urban | 261  | 4   | 0.5 (0, 1.2)      | 0.5 (0, 1.2)      | 360  | 1   | 0.5 (0, 1.1)   | 0.5 (0, 1.1)   |
| Sri Lanka   | Halambagaswewa                    | Rural | 246  | 4   | 8.2 (5.5, 10.9)   | 8.3 (5.5, 11.0)   | 504  | 7   | 3.8 (2.2, 5.3) | 3.8 (2.2, 5.3) |
| Sri Lanka   | Lolugaswewa                       | Rural | 221  | 0   | 5.8 (3.5, 8.1)    | 5.8 (3.5, 8.1)    | 576  | 7   | 4.5 (3.1, 6.0) | 4.5 (3.1, 5.9) |
| Sri Lanka   | Pothana                           | Rural | 201  | 7   | 4.9 (2.6, 7.2)    | 5.0 (2.6, 7.3)    | 504  | 7   | 1.6 (0.7, 2.6) | 1.7 (0.7, 2.6) |
| Sri Lanka   | Puhudivula                        | Rural | 224  | 2   | 7.6 (5.2, 10.1)   | 7.7 (5.2, 10.2)   | 580  | 4   | 3.6 (2.3, 4.9) | 3.6 (2.3, 5.0) |
| Sri Lanka   | Sangilikandarawa                  | Rural | 276  | 6   | 6.2 (3.9, 8.5)    | 6.1 (3.8, 8.4)    | 558  | 10  | 3.1 (1.8, 4.4) | 2.9 (1.6, 4.3) |
| Thailand    | Bangkok                           | Urban | 381  | 0   | 1.1 (0.1, 2.2)    | 1.1 (0.1, 2.2)    | 1223 | 0   | 0.7 (0.0, 1.3) | 0.7 (0.0, 1.3) |
| Thailand    | Central                           | Rural | 606  | 0   | 0.9 (0.3, 1.4)    | 0.9 (0.3, 1.4)    | 795  | 0   | 1.1 (0.4, 1.9) | 1.1 (0.4, 1.9) |
| Thailand    | Central                           | Urban | 519  | 0   | 0.6 (0.1, 1.1)    | 0.6 (0.1, 1.1)    | 832  | 0   | 0.4 (0.1, 0.7) | 0.4 (0.1, 0.7) |
| Thailand    | North                             | Rural | 668  | 0   | 1.1 (0.6, 1.7)    | 1.1 (0.6, 1.7)    | 730  | 0   | 1.0 (0.1, 1.8) | 1.0 (0.1, 1.8) |
| Thailand    | North                             | Urban | 445  | 0   | 1.1 (0, 2.3)      | 1.1 (0, 2.3)      | 604  | 0   | 1.0 (0.4, 1.6) | 1.0 (0.4, 1.6) |
| Thailand    | North East                        | Rural | 577  | 0   | 1.3 (0.5, 2.1)    | 1.3 (0.5, 2.1)    | 637  | 0   | 0.8 (0.3, 1.3) | 0.8 (0.3, 1.3) |
| Thailand    | North East                        | Urban | 492  | 0   | 0.7 (0, 1.4)      | 0.7 (0, 1.4)      | 609  | 0   | 0.6 (0.2, 1.0) | 0.6 (0.2, 1.0) |
| Thailand    | South                             | Rural | 549  | 0   | 0.5 (0.1, 1.0)    | 0.5 (0.1, 1.0)    | 678  | 0   | 0.2 (0, 0.5)   | 0.2 (0, 0.5)   |
| Thailand    | South                             | Urban | 303  | 0   | 0.7 (0.0, 1.4)    | 0.7 (0.0, 1.4)    | 489  | 0   | 1.1 (0.3, 2.0) | 1.1 (0.3, 2.0) |
| USA         | all                               | All   | 1727 | 62  | 2.0 (1.4, 2.6)    | 2.0 (1.4, 2.6)    | 1924 | 72  | 1.2 (0.8, 1.6) | 1.2 (0.8, 1.7) |

eGFR=estimated glomerular filtration rate; CI=confidence interval using normal approximation <sup>a</sup> age-standardised prevalence using WHO global population age weights;

Table S3: Age-standardised prevalence of eGFR<90 ml/min/1.73m<sup>2</sup> by sex (for age 18-60)

| Centre              | Area                      | Rural / Urban | Sample with complete data |                                    |       |                                    | Sample of people without hypertension, diabetes and heavy proteinuria |                                    |       |                                    |
|---------------------|---------------------------|---------------|---------------------------|------------------------------------|-------|------------------------------------|-----------------------------------------------------------------------|------------------------------------|-------|------------------------------------|
|                     |                           |               | Men                       |                                    | Women |                                    | Men                                                                   |                                    | Women |                                    |
|                     |                           |               | n                         | eGFR<90 <sup>a</sup><br>% (95% CI) | n     | eGFR<90 <sup>a</sup><br>% (95% CI) | n                                                                     | eGFR<90 <sup>a</sup><br>% (95% CI) | n     | eGFR<90 <sup>a</sup><br>% (95% CI) |
| Chile               | Molina                    | Rural         | 39                        | 36.2 (17.3, 55.2)                  | 17    | 59.1 (35.7, 82.4)                  | 16                                                                    | 35.9 (9.0, 62.8)                   | 6     | 100 (NA, NA)                       |
| Chile               | Molina                    | Urban         | 156                       | 42.1 (34.2, 50.0)                  | 264   | 49.0 (42.8, 55.8)                  | 66                                                                    | 47.5 (36.0, 59.0)                  | 137   | 46.5 (37.7, 55.2)                  |
| Ecuador             | Miguelillo                | Rural         | 312                       | 34.1 (29.2, 39.1)                  | 442   | 46.3 (41.9, 50.6)                  | 180                                                                   | 33.4 (26.6, 40.3)                  | 235   | 45.2 (38.6, 51.9)                  |
| England             | all                       | Rural         | 161                       | 35.7 (27.7, 43.8)                  | 223   | 36.1 (29.7, 42.5)                  | 98                                                                    | 35.8 (26.8, 44.7)                  | 169   | 37.3 (29.9, 44.8)                  |
| England             | all                       | Urban         | 744                       | 37.5 (33.9, 41.2)                  | 1007  | 31.7 (28.9, 34.5)                  | 515                                                                   | 38.1 (34.0, 42.2)                  | 759   | 32.9 (29.8, 35.9)                  |
| Guatemala           | San Antonio Suchitepequez | Rural         | 115                       | 17.2 (10.4, 24.1)                  | 221   | 11.0 (6.8, 15.1)                   | 86                                                                    | 14.8 (6.7, 22.8)                   | 171   | 10.3 (5.1, 15.6)                   |
| Guatemala           | Tecpan                    | Rural         | 109                       | 26.6 (19.0, 34.3)                  | 209   | 14.1 (9.7, 18.5)                   | 83                                                                    | 24.7 (15.4, 33.9)                  | 152   | 15.0 (8.9, 21.1)                   |
| India 1 (CARRS)     | Chennai                   | Urban         | 2333                      | 8.2 (7.1, 9.2)                     | 3033  | 5.8 (5.0, 6.7)                     | 1161                                                                  | 6.0 (4.6, 7.5)                     | 1915  | 5.4 (4.1, 6.7)                     |
| India 1 (CARRS)     | Delhi                     | Urban         | 1733                      | 11.4 (10.1, 12.7)                  | 1831  | 11.9 (10.6, 13.1)                  | 770                                                                   | 10.8 (8.6, 12.9)                   | 935   | 11.1 (8.9, 13.2)                   |
| India 2 (ICMR)      | Delhi                     | Urban         | 837                       | 33.3 (27.8, 38.8)                  | 1051  | 37.0 (33.9, 40.0)                  | 399                                                                   | 33.2 (25.8, 40.7)                  | 571   | 36.1 (32.2, 39.9)                  |
| India 2 (ICMR)      | Faridabad                 | Rural         | 629                       | 18.6 (16.4, 20.8)                  | 784   | 18.1 (12.8, 23.4)                  | 380                                                                   | 18.6 (15.6, 21.5)                  | 520   | 17.2 (11.0, 23.5)                  |
| India 3 (UDAY)      | Sonipat                   | Rural         | 768                       | 15.3 (9.1, 21.4)                   | 1136  | 12.3 (10.0, 14.5)                  | 530                                                                   | 13.7 (7.7, 19.8)                   | 847   | 12.5 (10.1, 15.0)                  |
| India 3 (UDAY)      | Sonipat                   | Urban         | 1038                      | 12.0 (10.5, 13.4)                  | 1184  | 11.2 (9.2, 13.2)                   | 586                                                                   | 10.9 (9.0, 12.8)                   | 768   | 9.9 (7.8, 12.0)                    |
| India 3 (UDAY)      | Vizag                     | Rural         | 934                       | 30.6 (24.6, 36.6)                  | 1242  | 20.1 (17.6, 22.6)                  | 696                                                                   | 30.2 (23.4, 37.0)                  | 933   | 19.1 (16.4, 21.8)                  |
| India 3 (UDAY)      | Vizag                     | Urban         | 903                       | 28.3 (23.1, 33.5)                  | 1130  | 14.6 (12.8, 16.5)                  | 469                                                                   | 27.8 (21.5, 34.0)                  | 692   | 12.8 (10.2, 15.4)                  |
| India 4 (Uddanam)   | Kanchili                  | Rural         | 148                       | 11.3 (6.3, 16.2)                   | 169   | 15.8 (10.2, 21.4)                  | 71                                                                    | 13.0 (5.6, 20.5)                   | 83    | 13.9 (6.7, 21.1)                   |
| India 4 (Uddanam)   | Kaviti                    | Rural         | 102                       | 19.7 (14.4, 24.9)                  | 110   | 20.0 (13.1, 26.9)                  | 52                                                                    | 12.5 (5.2, 19.7)                   | 65    | 14.0 (7.5, 20.5)                   |
| India 4 (Uddanam)   | Mandasa                   | Rural         | 95                        | 24.2 (16.1, 32.3)                  | 105   | 18.5 (13.1, 24.0)                  | 57                                                                    | 18.3 (8.5, 28.0)                   | 54    | 12.5 (6.7, 18.3)                   |
| India 4 (Uddanam)   | Palasa                    | Rural         | 186                       | 21.4 (15.5, 27.4)                  | 176   | 21.9 (15.5, 28.3)                  | 84                                                                    | 17.4 (9.2, 25.6)                   | 81    | 15.5 (8.5, 22.5)                   |
| India 4 (Uddanam)   | Sompeta                   | Rural         | 202                       | 16.2 (11.1, 21.4)                  | 241   | 12.7 (8.4, 17.0)                   | 99                                                                    | 14.0 (6.9, 21.0)                   | 127   | 17.1 (10.3, 23.9)                  |
| India 4 (Uddanam)   | V_kothuru                 | Rural         | 250                       | 14.7 (10.9, 18.5)                  | 281   | 13.7 (10.6, 16.8)                  | 101                                                                   | 11.4 (5.6, 17.3)                   | 121   | 11.6 (6.5, 16.7)                   |
| India 5 (Prakasham) | Kanigiri                  | Rural         | 420                       | 27.8 (23.7, 31.8)                  | 632   | 14.4 (11.8, 17.0)                  | 221                                                                   | 25.5 (20.0, 31.1)                  | 432   | 11.7 (8.3, 15.1)                   |
| Italy               | Barga                     | Rural         | 128                       | 31.5 (23.9, 39.2)                  | 173   | 38.0 (31.2, 44.8)                  | 73                                                                    | 31.5 (21.8, 41.2)                  | 149   | 36.1 (29.3, 43.0)                  |
| Kenya               | Muhoroni East             | Urban         | 138                       | 8.1 (4.0, 12.3)                    | 122   | 20.5 (12.1, 28.9)                  | 113                                                                   | 8.6 (3.6, 13.6)                    | 104   | 21.6 (17.5, 25.6)                  |
| Kenya               | Owaga                     | Rural         | 113                       | 10.3 (4.4, 16.1)                   | 129   | 16.1 (10.5, 21.7)                  | 88                                                                    | 8.5 (1.3, 15.8)                    | 98    | 17.9 (11.6, 24.2)                  |
| Kenya               | Tonde                     | Rural         | 114                       | 3.6 (0.5, 6.7)                     | 119   | 7.2 (2.6, 11.9)                    | 94                                                                    | 3.5 (0.2, 6.7)                     | 100   | 8.2 (2.5, 13.8)                    |
| Malawi              | Karonga                   | Rural         | 271                       | 17.6 (12.9, 22.3)                  | 375   | 14.5 (10.3, 18.8)                  | 214                                                                   | 15.0 (9.5, 20.4)                   | 309   | 13.8 (9.1, 18.5)                   |

|             |                                      |       |      |                   |      |                   |      |                   |      |                   |
|-------------|--------------------------------------|-------|------|-------------------|------|-------------------|------|-------------------|------|-------------------|
| Malawi      | Lilongwe                             | Urban | 96   | 24.4 (13.9, 34.9) | 216  | 24.7 (18.1, 31.3) | 74   | 27.4 (16.2, 38.6) | 159  | 31.3 (18.0, 44.6) |
| Nepal       | all                                  | Rural | 1690 | 31.4 (29.2, 33.7) | 2790 | 44.1 (42.4, 45.9) | 1002 | 29.3 (26.6, 32.0) | 1981 | 43.2 (41.2, 45.2) |
| Nepal       | all                                  | Urban | 1602 | 40.0 (37.5, 42.6) | 2834 | 54.9 (53.0, 56.8) | 822  | 38.5 (35.3, 41.7) | 1777 | 53.8 (51.6, 56.1) |
| Nicaragua 1 | Chinandega<br>(banana/sugarcane)     | Rural | 155  | 32.9 (25.5, 40.3) | 176  | 6.5 (2.8, 10.3)   | 104  | 25.1 (16.4, 33.8) | 111  | 2.2 (0, 4.6)      |
| Nicaragua 1 | Chinandega (service)                 | Rural | 50   | 9.3 (1.3, 17.2)   | 90   | 2.4 (0, 5.5)      | 34   | 9.2 (0, 20.2)     | 58   | 2.4 (0, 6.8)      |
| Nicaragua 1 | Leon (coffee)                        | Rural | 40   | 8.6 (0, 17.8)     | 37   | 5.6 (0, 14.4)     | 30   | 11.2 (0, 22.8)    | 26   | 0.0 (N/A)         |
| Nicaragua 1 | Leon (fishing)                       | Rural | 76   | 31.2 (21.4, 40.9) | 90   | 11.6 (4.5, 18.8)  | 55   | 24.5 (12.0, 36.9) | 73   | 6.4 (1.2, 11.7)   |
| Nicaragua 1 | Leon (mining/subsistence<br>farming) | Rural | 158  | 41.2 (34.2, 48.2) | 224  | 13.5 (8.8, 18.2)  | 106  | 35.9 (26.1, 45.6) | 144  | 7.3 (1.7, 12.8)   |
| Nicaragua 2 | Leon municipalities                  | Rural | 247  | 28.3 (23.0, 33.6) | 329  | 11.5 (8.0, 14.9)  | 145  | 23.5 (16.8, 30.2) | 211  | 9.3 (4.3, 14.3)   |
| Nicaragua 2 | Leon municipalities                  | Urban | 400  | 21.9 (18.4, 25.4) | 696  | 13.0 (10.8, 15.2) | 256  | 15.9 (11.2, 20.6) | 436  | 9.1 (6.5, 11.8)   |
| Peru        | Tumbes                               | Rural | 278  | 7.5 (5.0, 10.0)   | 344  | 4.0 (2.0, 6.0)    | 210  | 4.5 (2.1, 7.0)    | 285  | 4.9 (2.0, 7.7)    |
| Peru        | Tumbes                               | Urban | 257  | 15.5 (11.7, 19.3) | 359  | 5.2 (3.2, 7.3)    | 186  | 14.4 (9.8, 19.0)  | 305  | 4.6 (2.3, 6.8)    |
| Sri Lanka   | Halambagaswewa                       | Rural | 242  | 33.6 (28.6, 38.6) | 497  | 29.1 (25.9, 32.4) | 136  | 31.7 (25.1, 38.2) | 336  | 26.5 (22.6, 30.4) |
| Sri Lanka   | Lolugaswewa                          | Rural | 221  | 39.5 (33.2, 45.8) | 569  | 34.5 (31.4, 37.6) | 138  | 38.1 (31.3, 44.9) | 372  | 34.0 (30.3, 37.6) |
| Sri Lanka   | Pothana                              | Rural | 194  | 26.5 (22.0, 31.0) | 497  | 30.3 (27.1, 33.6) | 115  | 26.3 (20.1, 32.5) | 330  | 29.6 (25.6, 33.6) |
| Sri Lanka   | Puhudivula                           | Rural | 222  | 46.3 (40.6, 51.9) | 576  | 46.0 (42.5, 49.5) | 112  | 49.0 (42.7, 55.4) | 378  | 44.3 (39.9, 48.6) |
| Sri Lanka   | Sangilikandarawa                     | Rural | 270  | 30.4 (25.5, 35.3) | 548  | 29.5 (26.2, 32.7) | 157  | 27.7 (21.6, 33.8) | 346  | 27.9 (23.8, 31.9) |
| Thailand    | Bangkok                              | Urban | 381  | 18.8 (15.0, 22.6) | 1223 | 6.6 (5.4, 7.9)    | 233  | 20.3 (15.4, 25.2) | 943  | 6.4 (5.0, 7.8)    |
| Thailand    | Central                              | Rural | 606  | 11.6 (9.4, 13.9)  | 795  | 10.6 (8.6, 12.6)  | 424  | 11.4 (8.7, 14.2)  | 576  | 10.0 (7.7, 12.3)  |
| Thailand    | Central                              | Urban | 519  | 15.9 (12.9, 18.8) | 832  | 8.2 (6.6, 9.7)    | 336  | 15.0 (11.5, 18.5) | 587  | 7.7 (6.0, 9.5)    |
| Thailand    | North                                | Rural | 668  | 11.0 (8.8, 13.2)  | 730  | 7.4 (5.7, 9.2)    | 407  | 10.1 (7.4, 12.7)  | 498  | 7.2 (5.2, 9.2)    |
| Thailand    | North                                | Urban | 445  | 16.3 (12.5, 20.1) | 604  | 9.1 (7.0, 11.1)   | 267  | 15.2 (10.8, 19.7) | 409  | 8.6 (6.2, 11.0)   |
| Thailand    | North East                           | Rural | 577  | 12.5 (10.5, 14.6) | 637  | 33.2 (29.0, 37.5) | 428  | 11.9 (9.6, 14.2)  | 479  | 33.1 (28.5, 37.7) |
| Thailand    | North East                           | Urban | 492  | 16.4 (14.0, 18.8) | 609  | 42.1 (37.2, 46.9) | 351  | 14.7 (12.0, 17.5) | 450  | 38.8 (33.7, 43.9) |
| Thailand    | South                                | Rural | 549  | 9.9 (7.7, 12.0)   | 678  | 4.3 (2.9, 5.6)    | 366  | 10.0 (7.2, 12.7)  | 493  | 4.0 (2.5, 5.6)    |
| Thailand    | South                                | Urban | 303  | 14.5 (11.1, 17.9) | 489  | 7.7 (5.6, 9.8)    | 193  | 13.7 (9.5, 17.9)  | 356  | 7.3 (4.8, 9.7)    |
| USA         | all                                  | All   | 1665 | 25.7 (23.7, 27.6) | 1852 | 17.2 (15.6, 18.7) | 944  | 27.7 (25.0, 30.4) | 1163 | 16.5 (14.5, 18.6) |

<sup>a</sup> age-standardised prevalence using WHO global population age weights; <sup>b</sup> only 41-60 years included; eGFR=creatinine-based estimated glomerular filtration rate; CI=confidence interval using normal approximation; N/A=no CI available due to zero estimate

Table S4: Age-standardised prevalence of creatinine- and cystatin C-based eGFR<90 ml/min/1.73m<sup>2</sup>, for age 18-60 years, by sex, for participants with both measurements

| Centre                      | Area          | Rural / Urban | Sample with complete data |                                            |                                            |       |                                            |                                            | Sample of people without hypertension, diabetes, or heavy proteinuria |                                            |                                            |       |                                            |                                            |
|-----------------------------|---------------|---------------|---------------------------|--------------------------------------------|--------------------------------------------|-------|--------------------------------------------|--------------------------------------------|-----------------------------------------------------------------------|--------------------------------------------|--------------------------------------------|-------|--------------------------------------------|--------------------------------------------|
|                             |               |               | Men                       |                                            |                                            | Women |                                            |                                            | Men                                                                   |                                            |                                            | Women |                                            |                                            |
|                             |               |               | n                         | Creatinine eGFR<90 <sup>a</sup> % (95% CI) | Cystatin C eGFR<90 <sup>a</sup> % (95% CI) | n     | Creatinine eGFR<90 <sup>a</sup> % (95% CI) | Cystatin C eGFR<90 <sup>a</sup> % (95% CI) | n                                                                     | Creatinine eGFR<90 <sup>a</sup> % (95% CI) | Cystatin C eGFR<90 <sup>a</sup> % (95% CI) | n     | Creatinine eGFR<90 <sup>a</sup> % (95% CI) | Cystatin C eGFR<90 <sup>a</sup> % (95% CI) |
| England                     | all           | Rural         | 161                       | 35.7 (27.7, 43.8)                          | 32.3 (23.3, 41.4)                          | 223   | 36.1 (29.7, 42.5)                          | 18.3 (14.2, 22.4)                          | 98                                                                    | 35.8 (26.8, 44.7)                          | 32.4 (22.4, 42.4)                          | 169   | 37.3 (29.9, 44.8)                          | 15.6 (11.2, 20.0)                          |
| England                     | all           | Urban         | 744                       | 37.5 (33.9, 41.2)                          | 25.9 (22.9, 29.0)                          | 1007  | 31.7 (28.9, 34.5)                          | 23.0 (20.4, 25.6)                          | 515                                                                   | 38.1 (34.0, 42.2)                          | 23.9 (20.5, 27.3)                          | 759   | 32.9 (29.8, 35.9)                          | 20.0 (17.2, 22.8)                          |
| India 3 (UDAY) <sup>b</sup> | Sonipat       | Rural         | -                         | -                                          | -                                          | -     | -                                          | -                                          | 177                                                                   | 25.3 (9.2, 41.3)                           | 69.2 (51.0, 87.5)                          | 253   | 11.5 (7.4, 15.6)                           | 59.7 (51.5, 67.9)                          |
| India 3 (UDAY) <sup>b</sup> | Sonipat       | Urban         | -                         | -                                          | -                                          | -     | -                                          | -                                          | 199                                                                   | 10.1 (6.9, 13.4)                           | 70.0 (58.1, 81.9)                          | 273   | 8.7 (4.3, 13.2)                            | 57.4 (48.8, 65.9)                          |
| India 3 (UDAY) <sup>b</sup> | Vizag         | Rural         | -                         | -                                          | -                                          | -     | -                                          | -                                          | 269                                                                   | 30.9 (19.4, 42.5)                          | 78.6 (67.3, 90.0)                          | 325   | 19.1 (14.4, 23.7)                          | 60.4 (53.9, 66.8)                          |
| India 3 (UDAY) <sup>b</sup> | Vizag         | Urban         | -                         | -                                          | -                                          | -     | -                                          | -                                          | 152                                                                   | 29.2 (16.9, 41.5)                          | 66.4 (53.1, 79.8)                          | 244   | 13.2 (8.8, 17.6)                           | 56.9 (50.5, 63.3)                          |
| Kenya                       | Muhoroni East | Urban         | 4                         | 0.0 (N/A)                                  | 0.0 (N/A)                                  | 10    | 7.2 (0, 18.6)                              | 14.3 (2.9, 25.8)                           | 4                                                                     | 0.0 (N/A)                                  | 0.0 (N/A)                                  | 9     | 0.0 (N/A)                                  | 10.8 (0, 25.7)                             |
| Kenya                       | Owaga         | Rural         | 44                        | 7.2 (0, 15.3)                              | 38.4 (23.3, 53.4)                          | 50    | 21.0 (11.2, 30.8)                          | 31.6 (21.4, 41.7)                          | 37                                                                    | 7.2 (0, 15.3)                              | 27.9 (15.4, 40.3)                          | 43    | 19.7 (9.1, 30.3)                           | 29.5 (18.7, 40.4)                          |
| Kenya                       | Tonde         | Rural         | 26                        | 11.4 (0, 23.1)                             | 37.4 (26.3, 48.4)                          | 39    | 2.8 (0, 7.7)                               | 23.2 (14.6, 31.9)                          | 19                                                                    | 7.8 (0, 17.7)                              | 23.4 (10.1, 36.7)                          | 29    | 5.6 (0, 14.4)                              | 27.0 (14.1, 39.8)                          |
| Malawi                      | Karonga       | Rural         | 271                       | 17.6 (12.9, 22.3)                          | 15.9 (11.4, 20.5)                          | 375   | 14.5 (10.3, 18.8)                          | 19.9 (15.6, 24.2)                          | 214                                                                   | 15.0 (9.5, 20.4)                           | 15.3 (9.7, 20.8)                           | 309   | 13.8 (9.1, 18.5)                           | 18.2 (13.1, 23.2)                          |
| Malawi                      | Lilongwe      | Urban         | 96                        | 24.4 (13.9, 34.9)                          | 8.8 (0.8, 16.9)                            | 216   | 24.7 (18.1, 31.3)                          | 6.8 (2.3, 11.4)                            | 74                                                                    | 27.4 (16.2, 38.6)                          | 11.0 (0.8, 21.2)                           | 159   | 31.3 (18.0, 44.6)                          | 2.9 (0, 5.8)                               |
| Peru                        | Tumbes        | Rural         | 278                       | 7.5 (5.0, 10.0)                            | 12.8 (9.1, 16.5)                           | 343   | 4.0 (2.0, 6.0)                             | 15.0 (11.3, 18.7)                          | 210                                                                   | 4.5 (2.1, 7.0)                             | 14.1 (9.7, 18.5)                           | 284   | 4.9 (2.0, 7.7)                             | 15.4 (11.1, 19.8)                          |
| Peru                        | Tumbes        | Urban         | 257                       | 15.5 (11.7, 19.3)                          | 14.1 (10.1, 18.1)                          | 358   | 5.2 (3.2, 7.3)                             | 11.6 (8.4, 14.7)                           | 186                                                                   | 14.4 (9.8, 19.0)                           | 14.3 (9.5, 19.0)                           | 304   | 4.6 (2.3, 6.8)                             | 11.6 (8.1, 15.1)                           |

eGFR=estimated glomerular filtration rate; <sup>a</sup> age-standardised prevalence using WHO global population age weights; <sup>b</sup> complete data not available as only participants without hypertension, diabetes, or heavy proteinuria had cystatin C measured; N/A=no CI available due to zero estimate
